# Supplementary material for: WITHDRAWN: Tailoring N Configurations for Enhanced Methanol Oxidation on Pt Nanoparticles
Source: Research Square preprint supplement (doi:10.21203/rs.3.rs-6992882/v1), 2025-07-21
Supplement: Supplementary file 1 [file 3c7523724371934a50d881b4.docx]

**Supporting Information**

Tailoring N Configurations for Enhanced Methanol Oxidation on Pt Nanoparticles

*Hui Li* *,†

**Lanzhou University of Arts and Science, Lanzhou 730050, P. R. China; Email:* *1518236380@qq.com*


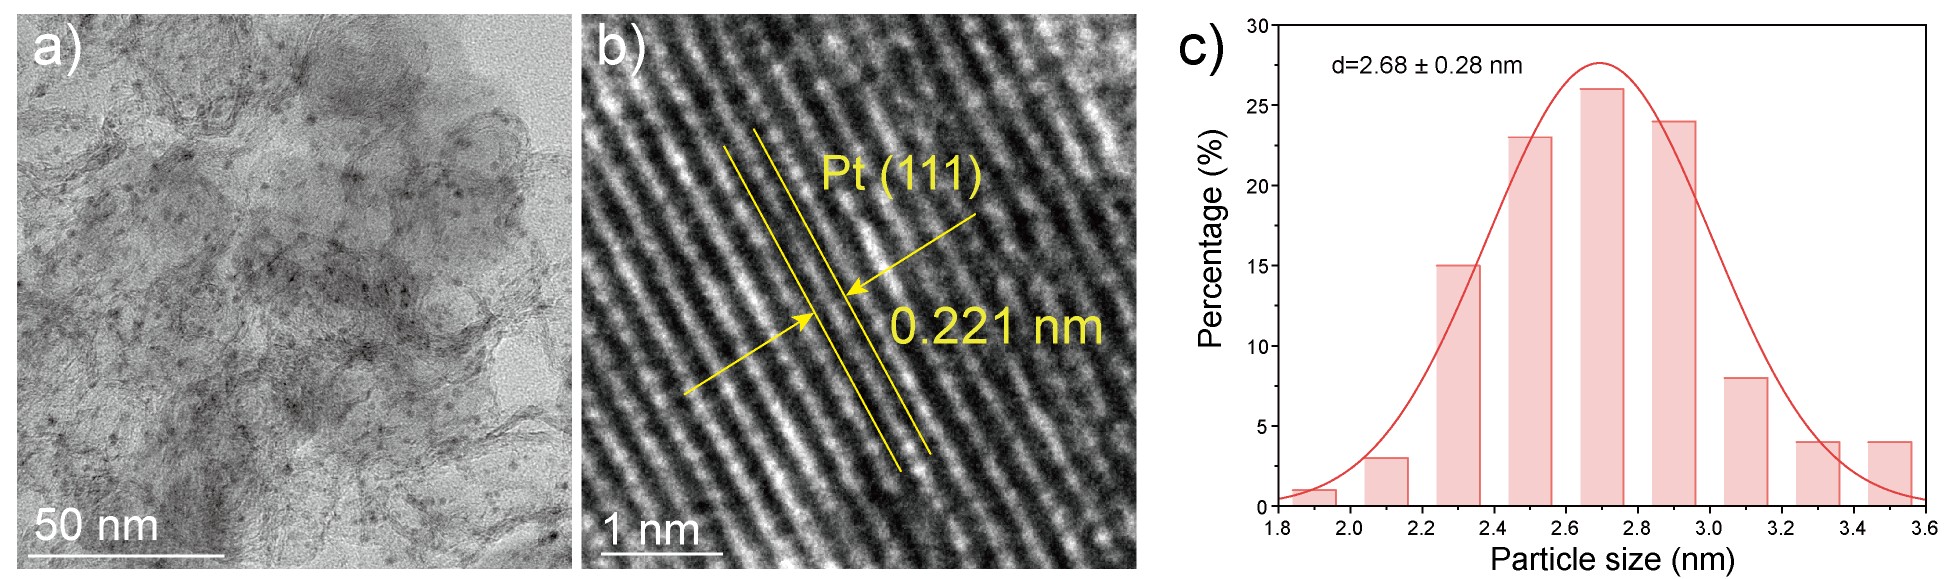


**Figure S1**. (a) TEM image of Pt/NPC-1000. (b) HRTEM of Pt/NPC-1000.

(c) particle size distribution histogram.


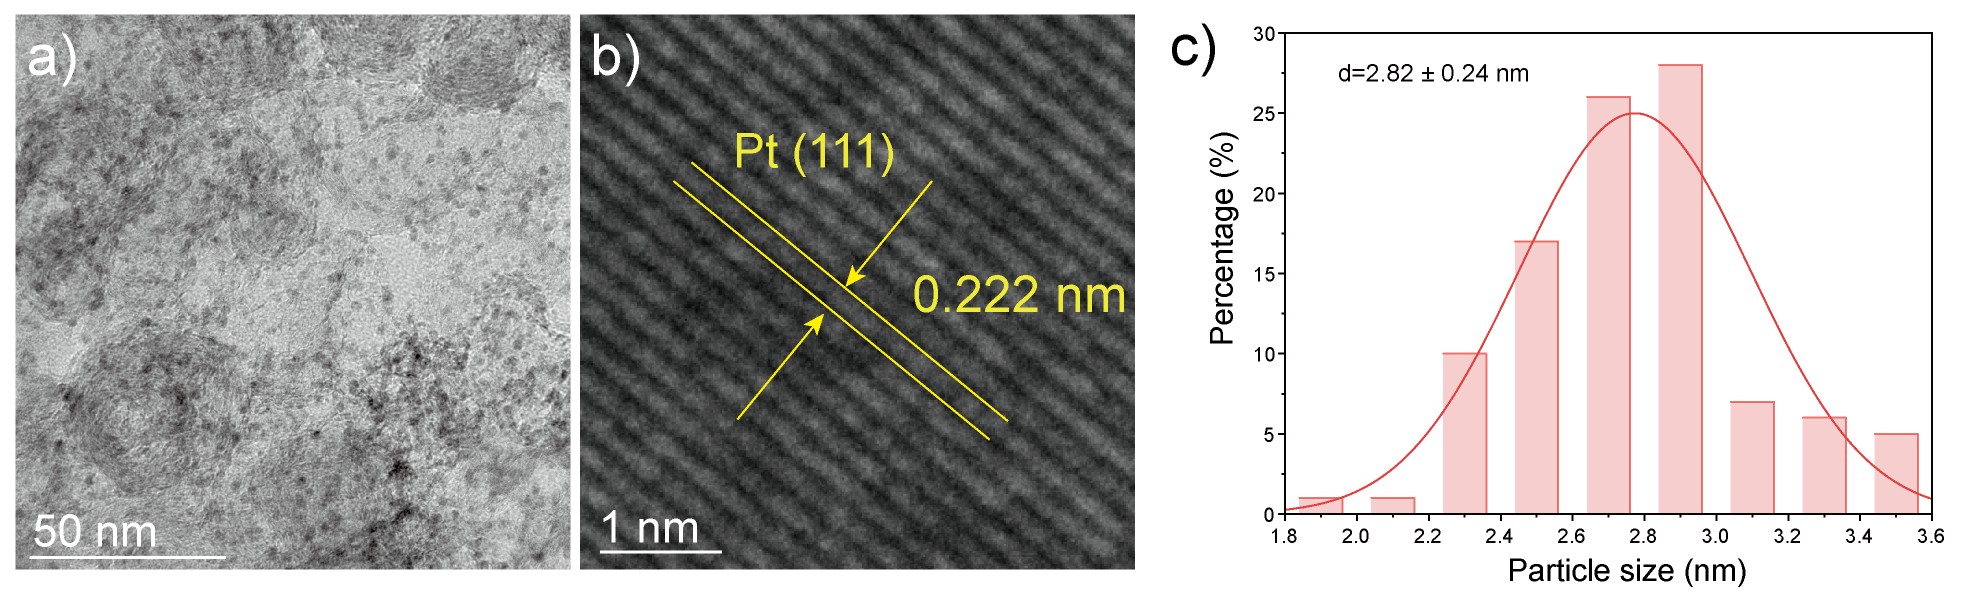


**Figure S2**. (a) TEM image of Pt/NPC-800. (b) HRTEM of Pt/NPC-800.

(c) particle size distribution histogram.


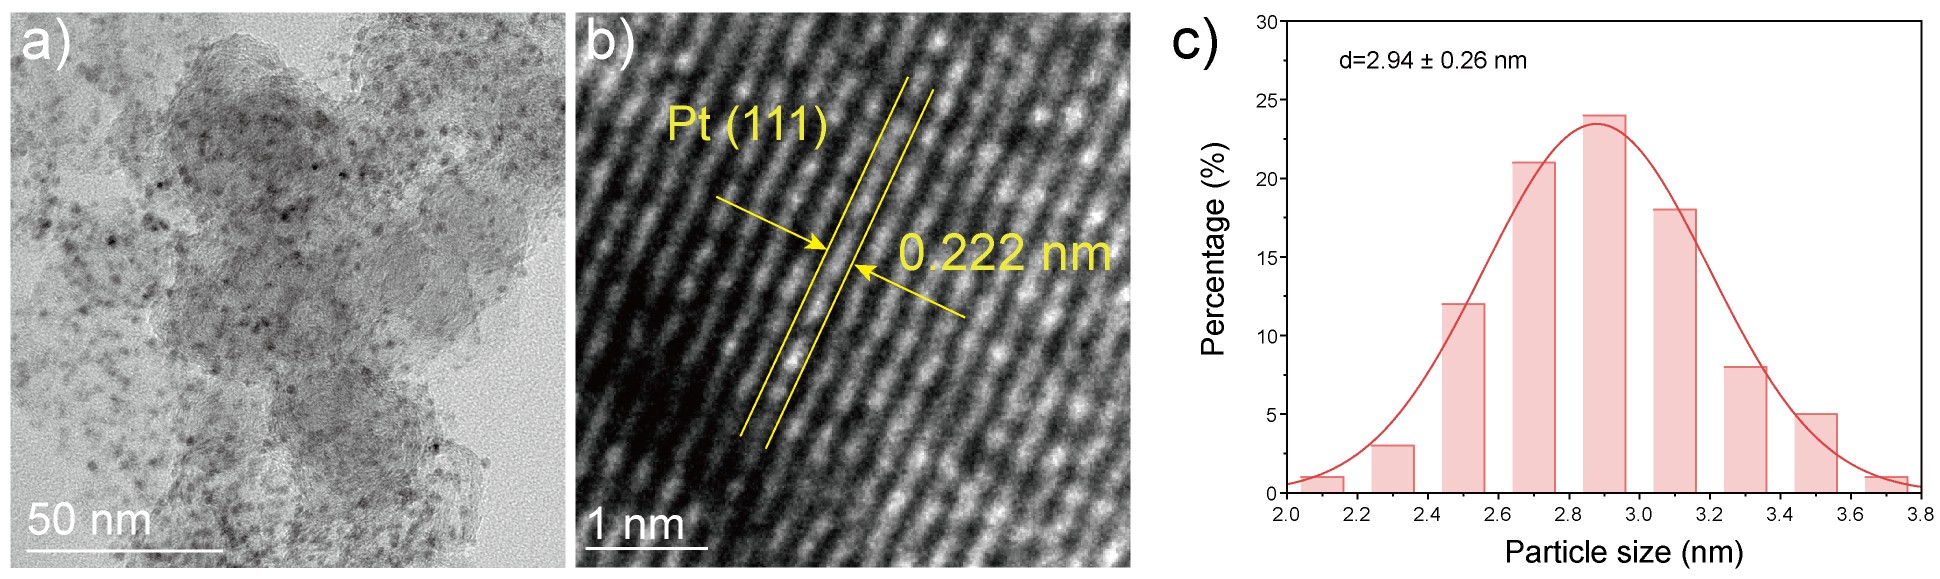


**Figure S3**. (a) TEM image of Pt/NPC-700. (b) HRTEM of Pt/NPC-700.

(c) particle size distribution histogram.


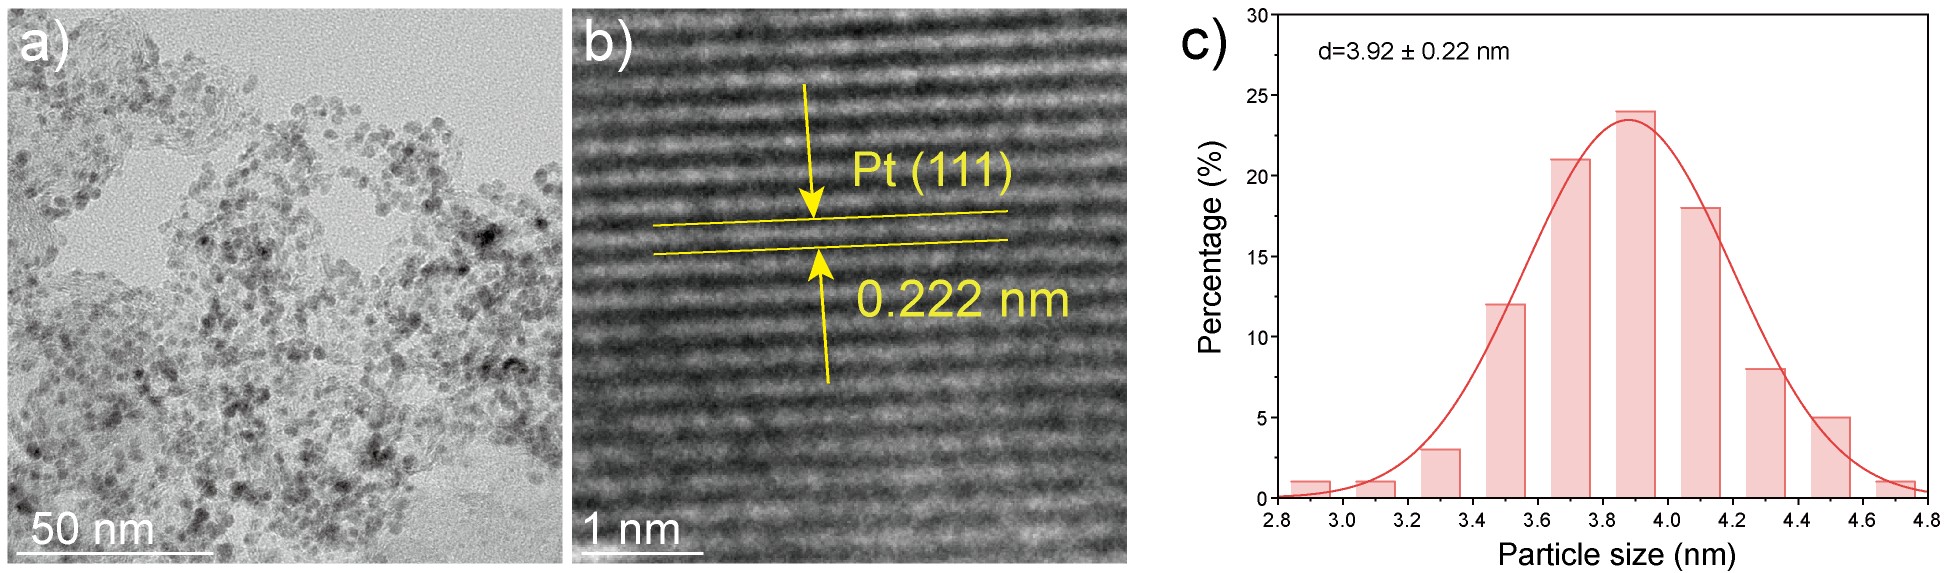


**Figure S4**. (a) TEM image of Pt/PC. (b) HRTEM of Pt/PC.

(c) particle size distribution histogram.

**Table S1.** Summary of Total Nitrogen Content and Proportions of Pyridinic-N, Pyrrolic-N, and Graphitic-N in all samples

| Samples | Total N content (at %) | Pyridinic-N  (%) | Pyrrolic-N  (%) | Graphitic-N  (%) |
| --- | --- | --- | --- | --- |
| Pt/NPC-700 | 9.78 | 65.7 | 20.1 | 14.2 |
| Pt/NPC-800 | 7.26 | 61.4 | 22.6 | 16 |
| Pt/NPC-900 | 6.53 | 56.7 | 25.2 | 18.1 |
| Pt/NPC-1000 | 5.48 | 53.4 | 26.3 | 20.3 |

**Table S2**. Evaluation data of electrochemical properties of synthetic catalysts

|  | Reverse scan | | Forward scan | |
| --- | --- | --- | --- | --- |
| Sampels | Peak potential  (V vs.RHE) | Peak current density (mA/mg) | Peak potential  (V vs.RHE) | Peak current density (mA/mg) |
| Pt/NPC-700 | -0.331 | 561.5 | -0.199 | 2456 |
| Pt/NPC-800 | -0.321 | 1190 | -0.236 | 3042 |
| Pt/NPC-900 | -0.319 | 1880 | -0.215 | 4687.5 |
| Pt/NPC-1000 | -0.321 | 843.8 | -0.212 | 3649 |
| Pt/PC | -0.314 | 181.4 | -0.220 | 1074 |

**Table S3**. Catalytic performance of advanced electrocatalysts reported previously for methanol electro-oxidation in alkaline medium.

| Catalysts | Test condition | scan rate (mV/s) | mass activity (mA·mg-1) | Ref |
| --- | --- | --- | --- | --- |
| **Pt/NPC-900** | **1.0 M KOH +1.0 M CH3OH** | **50 mV/s** | 4687.5 | **This work** |
| Pt doped Ni(OH)2 | 1.0 M KOH +1.0 M CH3OH | 50 mV/s | 1356 | 1 |
| Ni-Pt | 1.0 M KOH +1.0 M CH3OH | 50 mV/s | 2546 | 2 |
| PtCu Nanoframes | 1.0 M KOH +1.0 M CH3OH | 50 mV/s | 2260 | 3 |
| Pt-2D Fe2O3 | 1.0 M KOH +1.0 M CH3OH | 50 mV/s | 343 | 4 |
| Au/Ag/Pt Nanocrystals | 1.0 M KOH +1.0 M CH3OH | 50 mV/s | 960 | 5 |
| Pt-CoOOH-CDs/C | 1.0 M KOH +1.0 M CH3OH | 50 mV/s | 856 | 6 |

**Reference**

(1) Yuan, G.; Wang, L.; Zhang, X.; Wang, Q. Self-supported Pt nanoflakes-doped amorphous Ni(OH)2 on Ni foam composite electrode for efficient and stable methanol oxidation. *Journal of Colloid and Interface Science* **2019**, *536*, 189-195. DOI: https://doi.org/10.1016/j.jcis.2018.10.049.

(2) Artal, R.; Serrà, A.; Michler, J.; Philippe, L.; Gómez, E. Electrodeposition of Mesoporous Ni-Rich Ni-Pt Films for Highly Efficient Methanol Oxidation. *Nanomaterials* **2020**, *10* (8), 1435.

(3) Zhang, Z.; Luo, Z.; Chen, B.; Wei, C.; Zhao, J.; Chen, J.; Zhang, X.; Lai, Z.; Fan, Z.; Tan, C.; et al. One-Pot Synthesis of Highly Anisotropic Five-Fold-Twinned PtCu Nanoframes Used as a Bifunctional Electrocatalyst for Oxygen Reduction and Methanol Oxidation. *Advanced Materials* **2016**, *28* (39), 8712-8717. DOI: https://doi.org/10.1002/adma.201603075 (acccessed 2025/06/27).

(4) Hu, S.; Jiang, L.; Wang, B.; Ma, Y. Enhanced Electrocatalytic Methanol Oxidation Properties by Photo-Assisted Fe2O3 Nanoplates. *International Journal of Hydrogen Energy* **2019**, *44* (26), 13214-13220. DOI: https://doi.org/10.1016/j.ijhydene.2019.03.178.

(5) Xie, X.; Gao, G.; Kang, S.; Shibayama, T.; Lei, Y.; Gao, D.; Cai, L. Site-Selective Trimetallic Heterogeneous Nanostructures for Enhanced Electrocatalytic Performance. *Advanced Materials* **2015**, *27* (37), 5573-5577. DOI: https://doi.org/10.1002/adma.201501133 (acccessed 2025/06/27).

(6) Tu, W.; Sun, Y.; Wu, D.; Wang, H.; Huang, H.; Shao, M.; Liu, Y.; Kang, Z. Cobalt oxyhydroxide and carbon dots modified by platinum as superior electrocatalyst for methanol oxidation. *Materials Chemistry and Physics* **2019**, *225*, 64-71. DOI: https://doi.org/10.1016/j.matchemphys.2018.12.066.
